# Supplementary material
Source: PubMed Central journal article supplement (PMC6221917)

# Figure S1

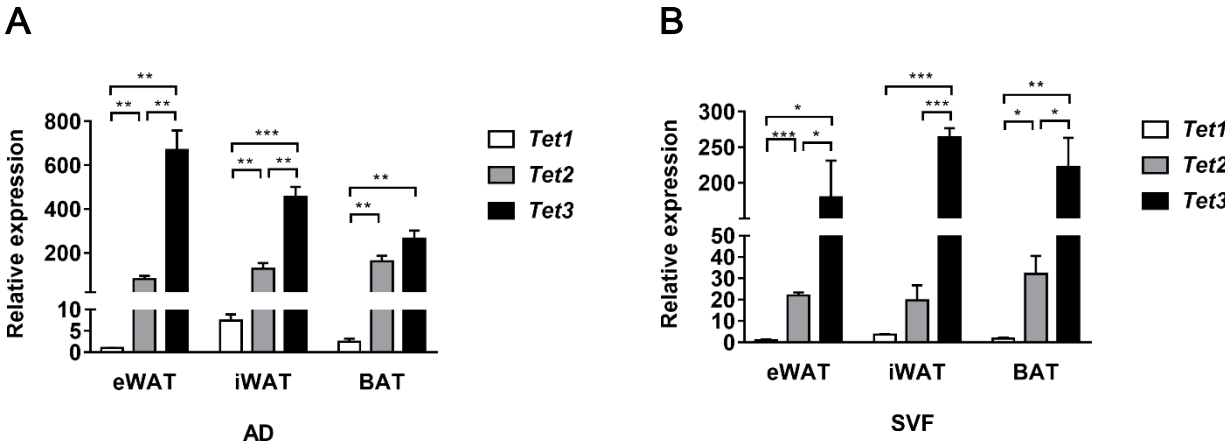

# Figure S2

A

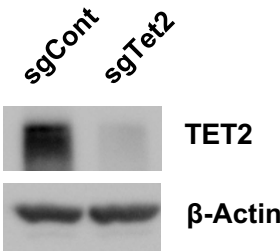

B

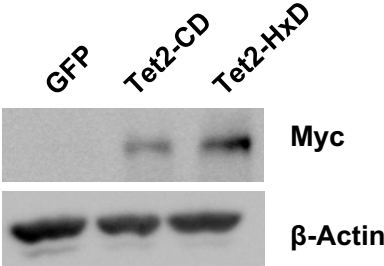

Figure S3

A

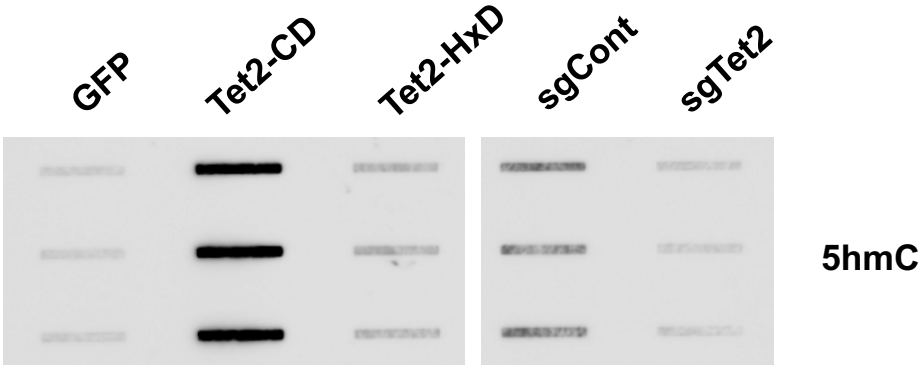

B

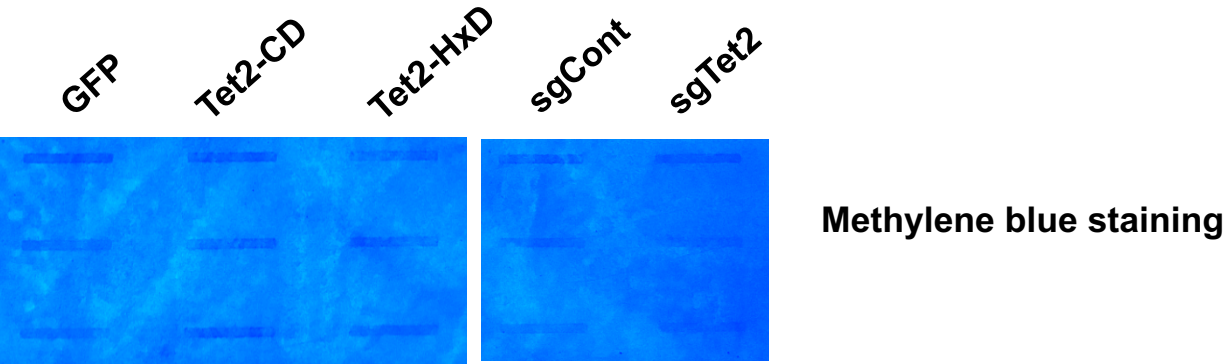

C

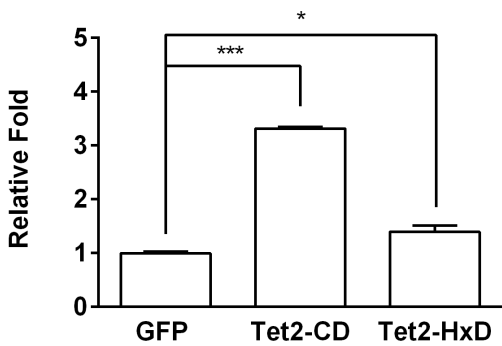

D

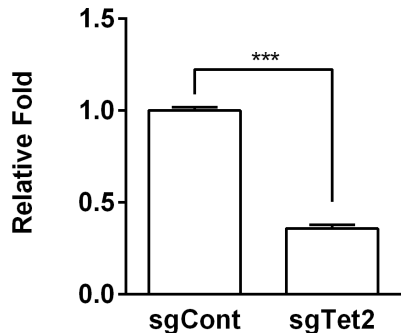

# Figure S4

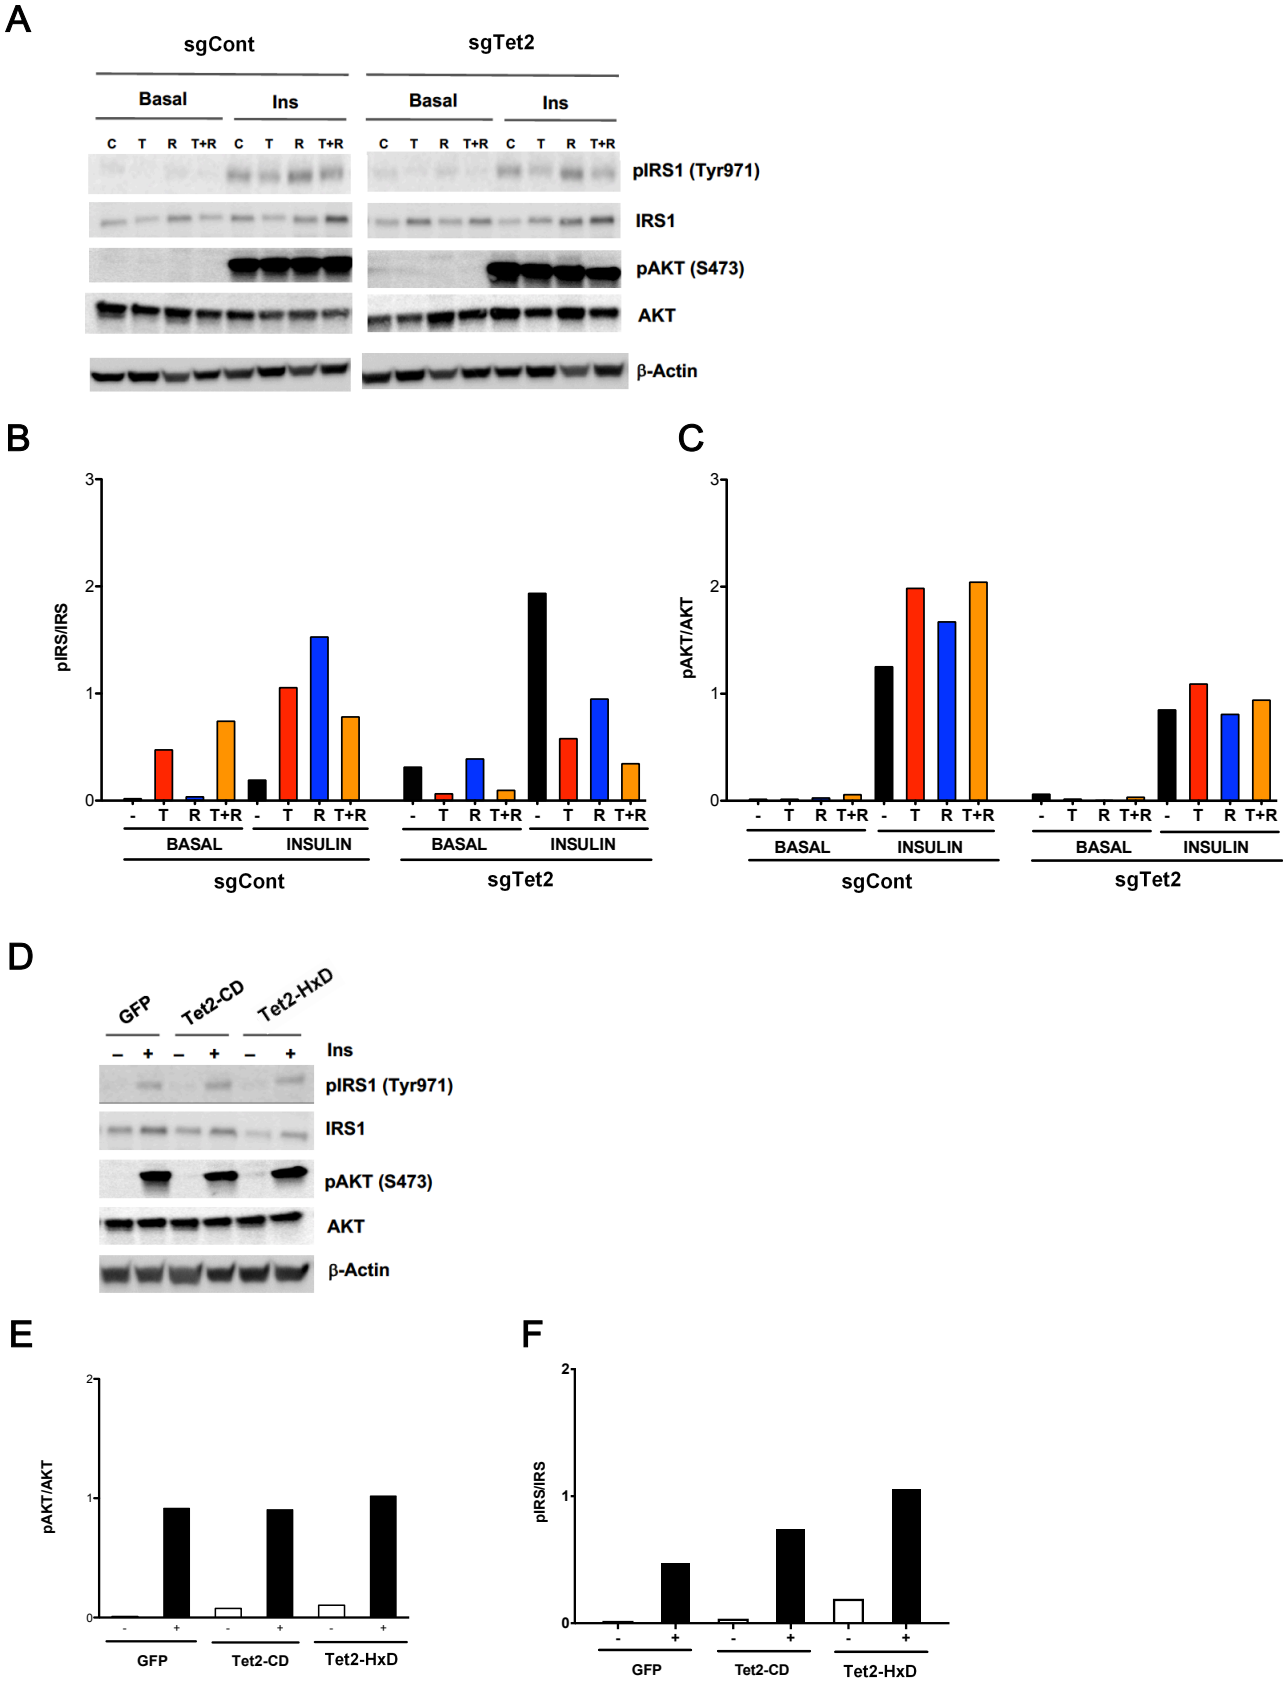

**Figure S5**

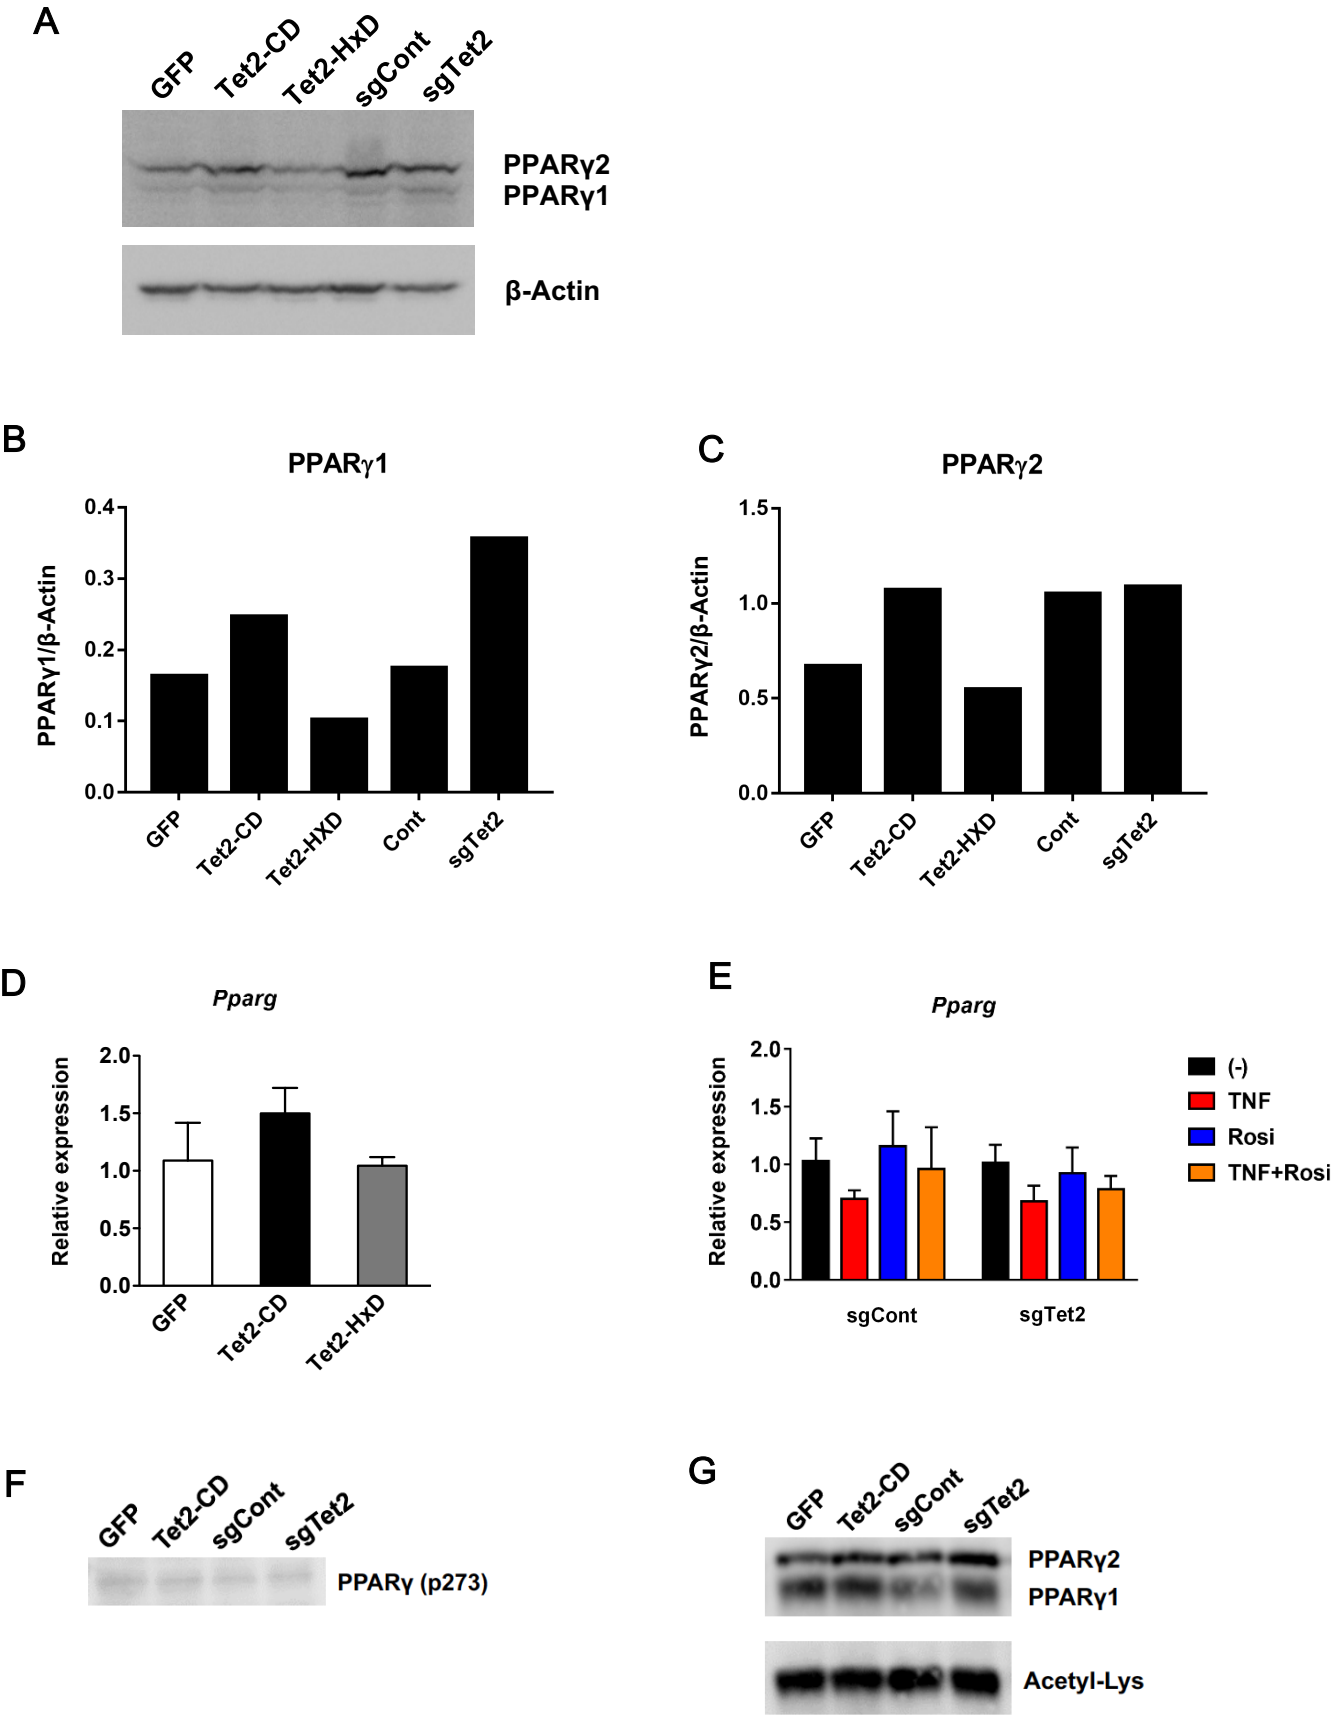

# Figure S6

A

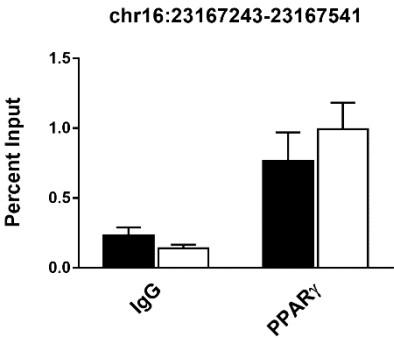

B

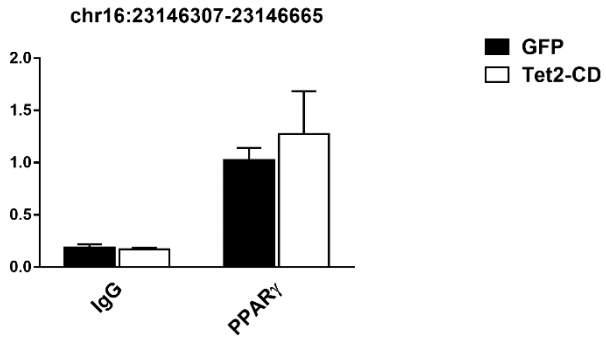

■ GFP  
□ Tet2-CD

C

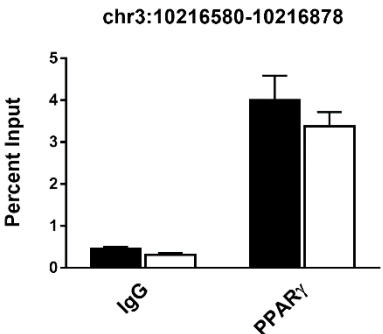

D

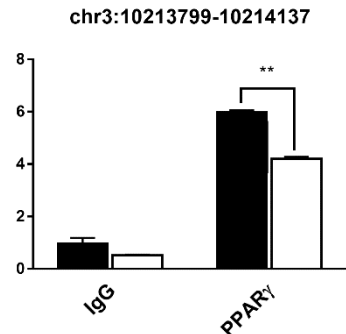

E

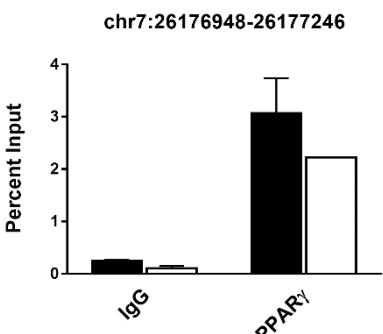

F

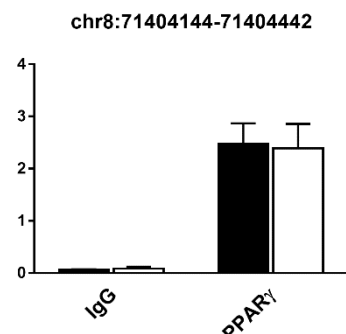

G

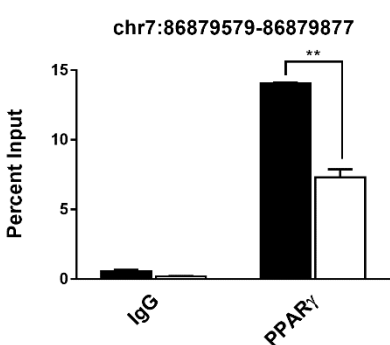

H

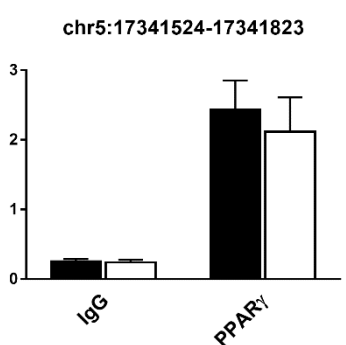

Supplement: NIHMS1506317-supplement-Supplemental_Figures.pdf [file NIHMS1506317-supplement-Supplemental_Figures.pdf]
